# Supplementary material for: Discovery of Biomarkers for Amyotrophic Lateral Sclerosis from Human Cerebrospinal Fluid Using Mass-Spectrometry-Based Proteomics
Source: MDPI journal article supplement (doi:10.3390/biomedicines11051250), 2023-04-23
Supplement: s1 [file s1]

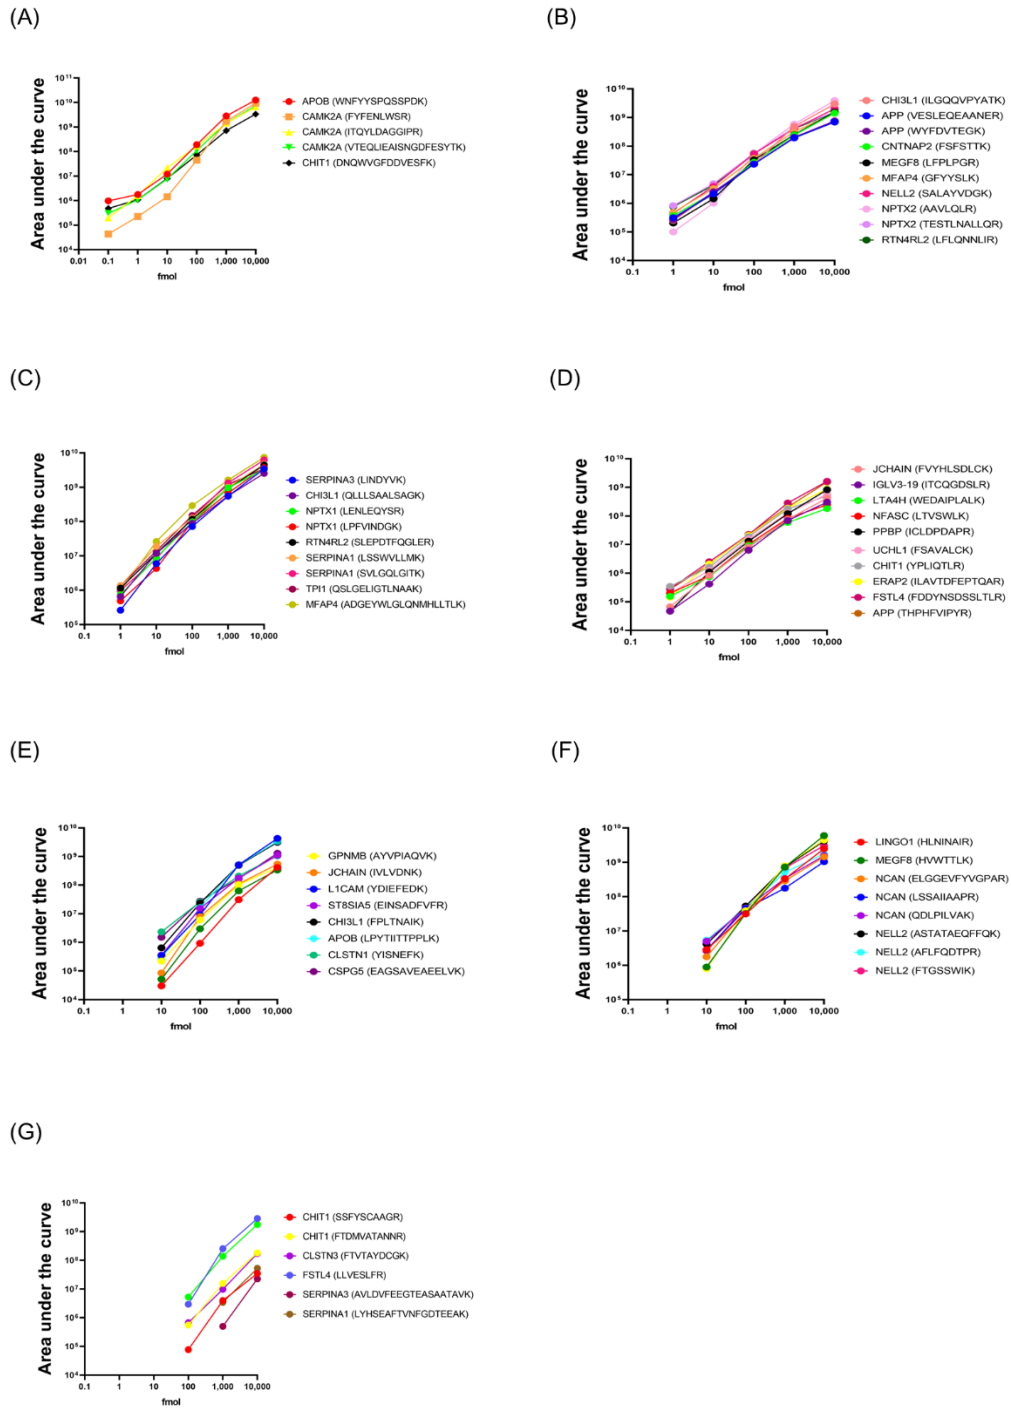

**Supplemental Figure S1.** The response curve of candidate biomarker peptides in the PRM analysis.

The SIL standard peptides ranging from 0.01 fmol to 10 pmol were added to the CSF samples and quantified by the PRM analysis to monitor the dynamic range of each target peptide. The peptides with various response curves are shown; 0.01 to 10,000 fmol (A), 0.1 to 10,000 fmol (B, C, and D), 1 to 10,000 fmol (E and F), and 10 or 100 fmol to 10,000 mol (G).

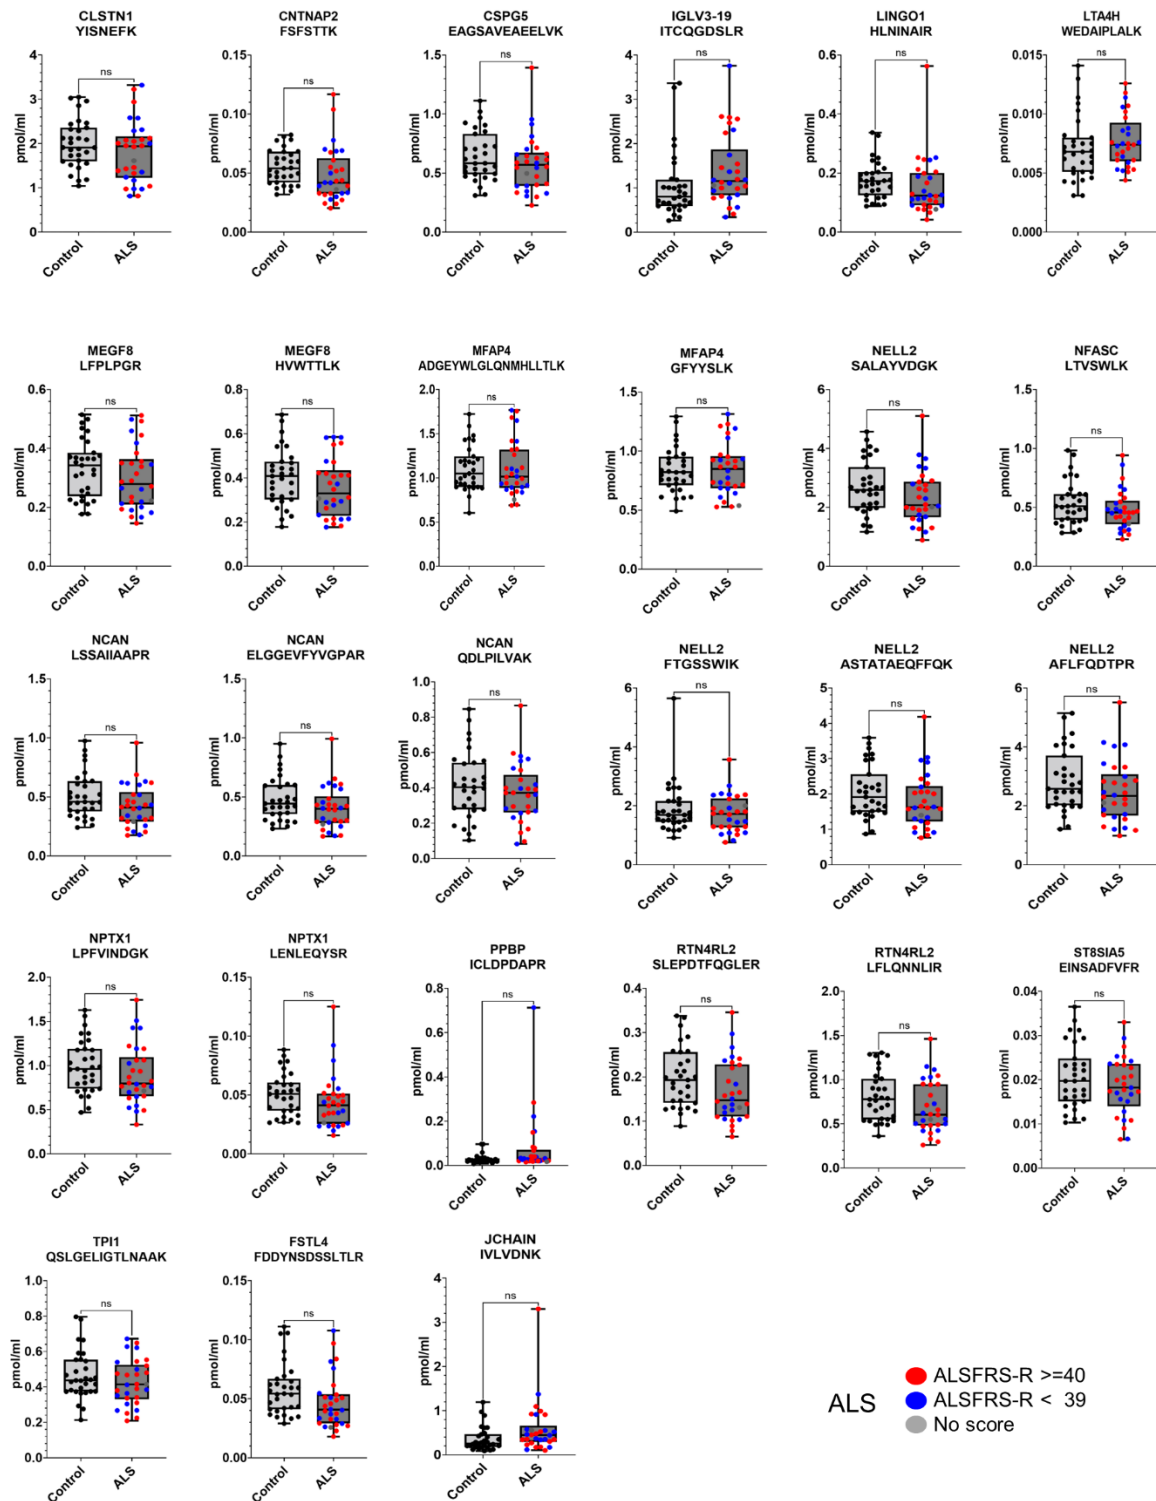

**Supplemental Figure S2.** The peptides that did not show statistically different differences between ALS and HC in the PRM-MS assay.

The peptides of the ALS candidate biomarker proteins identified in the discovery experiment were validated by PRM-MS. The peptides that did not show statistically significant differences between ALS and HC in the PRM-MS analyses are shown here. Patients with ALSFRS scores  $< 39$  were shown in blue dots, and patients with ALSFRS scores  $\geq 40$  were shown in red dots. Since one ALS patient had no score, the patient was shown in a gray dot. All PRM-MS analyses were performed in 3 technical replicates. Student's unpaired, two-tailed *t*-test was conducted for statistical analysis between groups (ns: not significant).

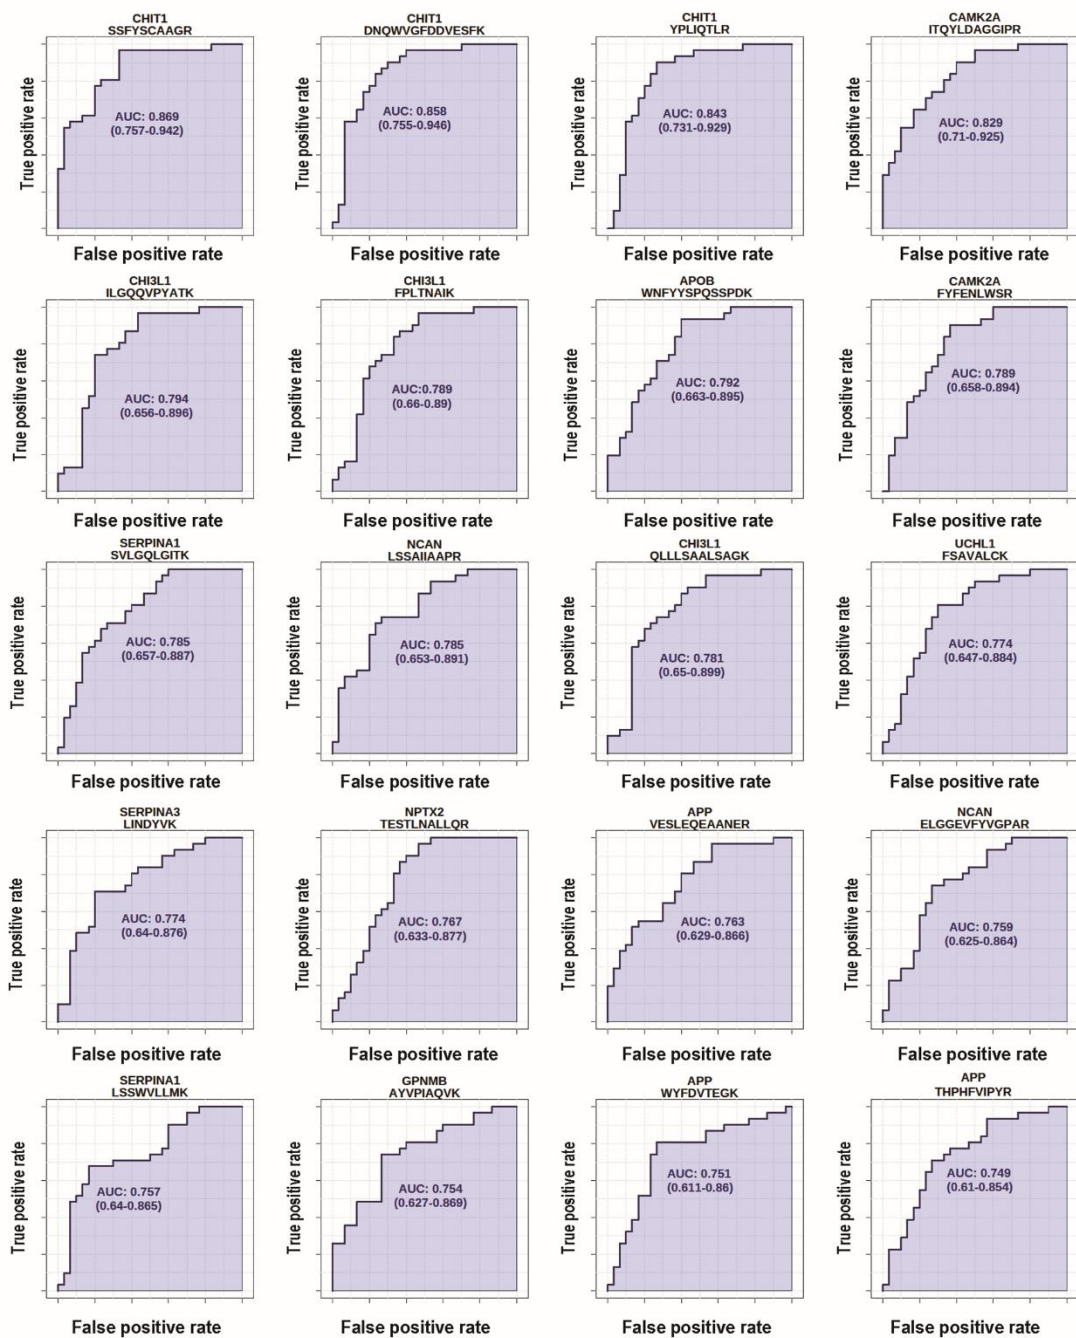

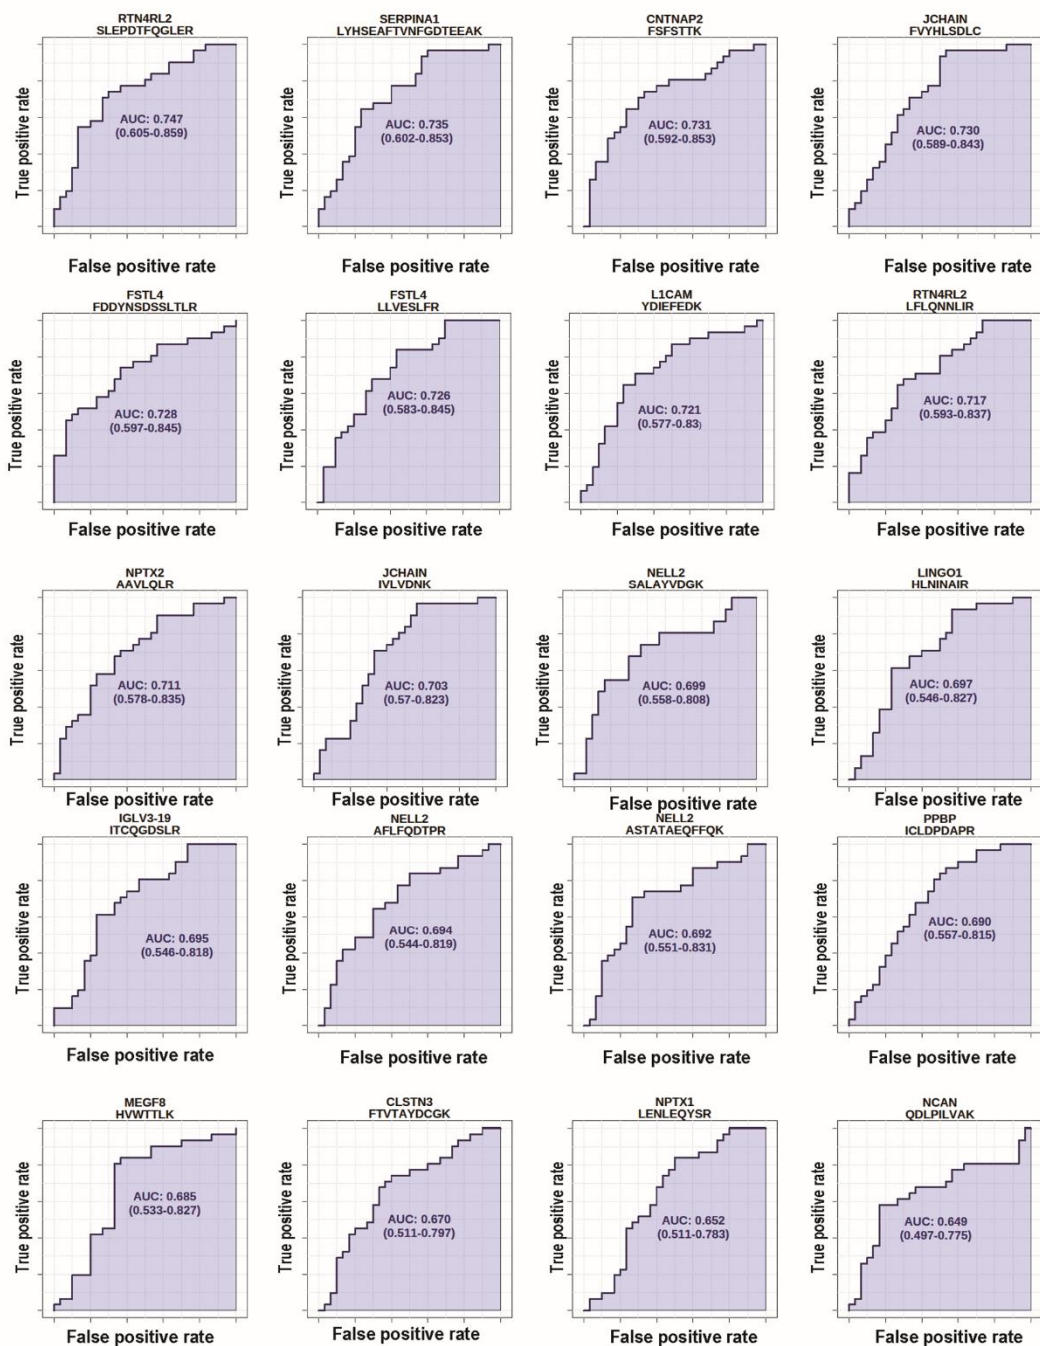

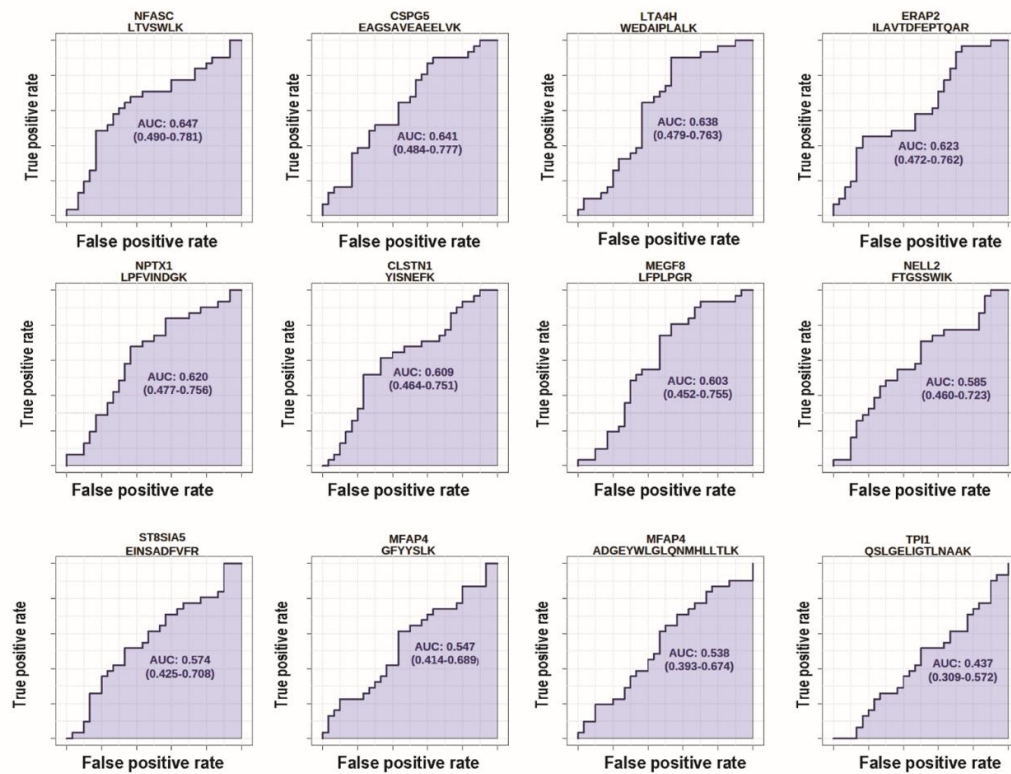

**Supplemental Table S3.** ROC analyses of peptides from the candidate ALS biomarker proteins from the discovery experiment.

ROC analysis was generated by bootstrapping. The values in the parenthesis show the lower and upper AUC values of 95% confidence interval. X-axis denotes a false positive rate (1-specificity) and Y-axis denotes a true positive rate (sensitivity).

**Supplemental Table S1.** The list of peptides detected in the PRM-MS analysis.

| Gene symbol | Peptide sequence    | light (m/z) | heavy (m/z) | Charge state (+) | HCD fragmentation energy | Maximum ion injection time |
|-------------|---------------------|-------------|-------------|------------------|--------------------------|----------------------------|
| APOB        | LPYTIITPPLK         | 678.9105    | 682.9176    | 2                | 32                       | 50                         |
| APOB        | WNFYYSQSSPDK        | 809.8623    | 813.8694    | 2                | 24                       | 50                         |
| APP         | VESLEQEAAANER       | 687.8284    | 692.8326    | 2                | 32                       | 100                        |
| APP         | THPHFVIPYR          | 633.8407    | 638.8449    | 2                | 32                       | 100                        |
| APP         | WYFDVTEGK           | 572.7691    | 576.7762    | 2                | 32                       | 100                        |
| CAMK2A      | VTEQLIEAISNGDFESYTK | 1072.523    | 1076.53     | 2                | 24                       | 50                         |
| CAMK2A      | FYFENLWSR           | 631.3037    | 636.3078    | 2                | 20                       | 50                         |
| CAMK2A      | ITQYLDAGGIPR        | 652.3539    | 657.358     | 2                | 20                       | 50                         |
| CHI3L1      | QLLLSAALSAGK        | 586.3559    | 590.363     | 2                | 32                       | 100                        |
| CHI3L1      | FPLTNAIK            | 452.2686    | 456.2757    | 2                | 32                       | 100                        |
| CHI3L1      | ILGQQVPYATK         | 609.3481    | 613.3552    | 2                | 32                       | 100                        |
| CHIT1       | YPLIQTLR            | 502.3004    | 507.3045    | 2                | 32                       | 50                         |
| CHIT1       | DNQWVGFDDEVESFK     | 843.3757    | 847.3828    | 2                | 20                       | 50                         |
| CHIT1       | SSFYSCAAGR          | 553.2402    | 558.2443    | 2                | 20                       | 50                         |
| CHIT1       | FTDMVATANNR         | 620.293     | 625.2971    | 2                | 20                       | 50                         |
| CLSTN1      | YISNEFK             | 450.7267    | 454.7338    | 2                | 32                       | 100                        |
| CLSTN3      | FTVTAYDCGK          | 581.2659    | 585.273     | 2                | 20                       | 50                         |
| CNTNAP2     | FSFSTTK             | 409.2082    | 413.2153    | 2                | 32                       | 100                        |
| CSPG5       | EAGSAVEAEELVK       | 666.3381    | 670.3452    | 2                | 32                       | 100                        |
| ERAP2       | ILAVTDFEPTQAR       | 730.8908    | 735.895     | 2                | 24                       | 50                         |
| FSTL4       | FDDYNSDSSLTLR       | 766.8468    | 771.8509    | 2                | 24                       | 50                         |
| FSTL4       | LLVESLFR            | 488.7949    | 493.7991    | 2                | 24                       | 50                         |
| GNPMB       | AYVPFAQVK           | 494.7949    | 498.802     | 2                | 28                       | 50                         |
| IGLV3-19    | ITCQGDLSR           | 525.2558    | 530.26      | 2                | 28                       | 50                         |
| JCHAIN      | IVLVDNK             | 400.7475    | 404.7546    | 2                | 20                       | 50                         |
| JCHAIN      | FVYHLSDLCK          | 641.3184    | 645.3255    | 2                | 20                       | 50                         |
| L1CAM       | YDIEFEDK            | 529.7375    | 533.7446    | 2                | 24                       | 50                         |
| LINGO1      | HLNINAIR            | 475.7802    | 480.7843    | 2                | 32                       | 100                        |
| LTA4H       | WEDAIPALK           | 578.3241    | 582.3312    | 2                | 24                       | 50                         |
| MEGF8       | HVWTTLK             | 442.7531    | 446.7602    | 2                | 32                       | 100                        |
| MEGF8       | LFPLPGR             | 400.2449    | 405.249     | 2                | 32                       | 100                        |
| MFAP4       | GFYYSLK             | 439.2264    | 443.2335    | 2                | 32                       | 100                        |
| MFAP4       | ADGEYWLGLQNMHLLTLK  | 701.3628    | 704.0342    | 3                | 32                       | 100                        |
| NCAN        | ELGGEVFYVGPAR       | 697.3592    | 702.3633    | 2                | 32                       | 100                        |
| NCAN        | LSSAIIAAPR          | 499.8033    | 504.8074    | 2                | 32                       | 100                        |
| NCAN        | QDLPILVAK           | 498.808     | 502.8151    | 2                | 32                       | 100                        |
| NELL2       | FTGSSWIK            | 463.2425    | 467.2496    | 2                | 32                       | 100                        |
| NELL2       | SALAYVDGK           | 462.2453    | 466.2524    | 2                | 32                       | 100                        |
| NELL2       | AFLFQDTPR           | 547.7851    | 552.7892    | 2                | 32                       | 100                        |
| NELL2       | ASTATAEQFFQK        | 664.8277    | 668.8348    | 2                | 32                       | 100                        |
| NFASC       | LTVSWLK             | 423.7578    | 427.7649    | 2                | 24                       | 50                         |
| NPTX1       | LPFVINDGK           | 501.7846    | 505.7917    | 2                | 32                       | 100                        |
| NPTX1       | LENLEQYSR           | 576.2882    | 581.2923    | 2                | 32                       | 100                        |
| NPTX2       | AAVLQLR             | 385.7478    | 390.7519    | 2                | 32                       | 100                        |
| NPTX2       | TESTLNALLQR         | 623.3435    | 628.3476    | 2                | 32                       | 100                        |
| PPBP        | ICLDPDAPR           | 528.7608    | 533.7649    | 2                | 20                       | 50                         |
| RTN4RL2     | LFLQNNLIR           | 565.8377    | 570.8418    | 2                | 32                       | 100                        |
| RTN4RL2     | SLEPDTFQGLER        | 696.3437    | 701.3478    | 2                | 32                       | 100                        |
| SERPINA1    | SVLGQLGITK          | 508.3109    | 512.318     | 2                | 32                       | 100                        |
| SERPINA1    | LYHSEFTVNFGDTEEAK   | 686.6532    | 689.3246    | 3                | 32                       | 100                        |
| SERPINA1    | LSSWVLLMK           | 538.8123    | 542.8194    | 2                | 32                       | 100                        |
| SERPINA3    | AVLDVFEEGTEASAATAVK | 636.6581    | 639.3295    | 3                | 32                       | 100                        |
| SERPINA3    | LINDYVK             | 432.7449    | 436.752     | 2                | 32                       | 100                        |
| ST8SIA5     | EINSADFVFR          | 599.2986    | 604.3027    | 2                | 24                       | 50                         |
| TPI1        | QSLGELIGTLNAAK      | 707.8986    | 711.9057    | 2                | 32                       | 100                        |
| UCHL1       | FSAVALCK            | 448.2389    | 452.246     | 2                | 24                       | 50                         |



**Supplemental Table S2.** Average abundance of each peptide quantified by PRM-MS and their statistical analysis results.

| Name     | Peptide sequence    | Control<br>(pmol/ml) | ALS<br>(pmol/ml) | P value | Area under ROC curve |
|----------|---------------------|----------------------|------------------|---------|----------------------|
| APOB     | LPYTIITPPLK         | 0.008                | 0.029            | 0.015   | 0.837                |
| APOB     | WNFYYSPPQSSPDK      | 0.039                | 0.122            | 0.017   | 0.792                |
| APP      | VESLEQEAAANER       | 4.37                 | 3.459            | 0.008   | 0.763                |
| APP      | THPHFVIPYR          | 13.10                | 11.00            | 0.035   | 0.749                |
| APP      | WYFDVTEGK           | 2.86                 | 2.386            | 0.037   | 0.751                |
| CAMK2A   | VTEQLIEAISNGDFESYTK | 2.498                | 1.865            | 0.01    | 0.839                |
| CAMK2A   | ITQYLDAGGIPR        | 0.535                | 0.412            | 0.014   | 0.829                |
| CAMK2A   | FYFENLWSR           | 0.402                | 0.316            | 0.03    | 0.789                |
| CHI3L1   | ILGQQVPYATK         | 0.184                | 0.261            | 0.004   | 0.794                |
| CHI3L1   | QLLSAALSAGK         | 0.977                | 1.359            | 0.006   | 0.781                |
| CHI3L1   | FPLTNAIK            | 0.229                | 0.317            | 0.009   | 0.789                |
| CHIT1    | FTDMVATANNR         | 0.041                | 0.365            | 9E-04   | 0.868                |
| CHIT1    | DNQWVGFDVESFK       | 0.041                | 0.356            | 0.001   | 0.858                |
| CHIT1    | SSFYSCAAGR          | 0.042                | 0.338            | 0.002   | 0.869                |
| CHIT1    | YPLIQTLR            | 0.011                | 0.084            | 0.011   | 0.843                |
| CLSTN1   | YISNEFK             | 1.999                | 1.801            | 0.219   | 0.609                |
| CLSTN3   | FTVTAYDCGK          | 0.031                | 0.025            | 0.002   | 0.670                |
| CNTNAP2  | FSFSTTK             | 0.056                | 0.048            | 0.144   | 0.731                |
| CSPG5    | EAGSAVEAEELVK       | 0.643                | 0.576            | 0.247   | 0.641                |
| ERAP2    | ILAVTDFEPTQAR       | 0.006                | 0.009            | 0.044   | 0.623                |
| FSTL4    | LLVESLFR            | 0.051                | 0.039            | 0.008   | 0.726                |
| FSTL4    | FDDYNSDSSLTLR       | 0.058                | 0.047            | 0.055   | 0.728                |
| GPNUMB   | AYVPIAQVK           | 0.098                | 0.127            | 0.02    | 0.754                |
| IGLV3-19 | ITCQGDSLR           | 1.05                 | 1.395            | 0.087   | 0.695                |
| JCHAIN   | FVYHLSDLCK          | 0.337                | 0.57             | 0.037   | 0.730                |
| JCHAIN   | IVLVDNK             | 0.36                 | 0.591            | 0.055   | 0.703                |
| L1CAM    | YDIEFEDK            | 0.099                | 0.083            | 0.034   | 0.721                |
| LINGO1   | HLNINAIR            | 0.176                | 0.154            | 0.286   | 0.697                |
| LTA4H    | WEDAIPALAK          | 0.007                | 0.008            | 0.305   | 0.638                |
| MEGF8    | HVWTTLK             | 0.405                | 0.355            | 0.138   | 0.685                |
| MEGF8    | LFPLPGR             | 0.332                | 0.3              | 0.231   | 0.603                |
| MFAP4    | GFYYSLK             | 0.838                | 0.849            | 0.837   | 0.547                |
| MFAP4    | ADGEYWLGLQNMHLLTLK  | 1.109                | 1.103            | 0.934   | 0.538                |
| NCAN     | LSSAIIAAPR          | 0.511                | 0.422            | 0.065   | 0.785                |
| NCAN     | ELGGEVFYVGPAR       | 0.481                | 0.404            | 0.103   | 0.759                |
| NCAN     | QDLPLVAK            | 0.413                | 0.368            | 0.338   | 0.649                |
| NELL2    | SALAYVDGK           | 2.694                | 2.335            | 0.129   | 0.699                |
| NELL2    | AFLFQDTPR           | 2.852                | 2.478            | 0.169   | 0.694                |
| NELL2    | ASTATAEQFFQK        | 2.064                | 1.803            | 0.186   | 0.692                |
| NELL2    | FTGSSWIK            | 1.910                | 1.721            | 0.332   | 0.585                |
| NFASC    | LTVSWLK             | 0.541                | 0.481            | 0.19    | 0.647                |
| NPTX1    | LENLEQYSR           | 0.051                | 0.044            | 0.206   | 0.652                |
| NPTX1    | LPFVINDGK           | 0.995                | 0.892            | 0.212   | 0.620                |
| NPTX2    | TESTLNALLQR         | 0.226                | 0.171            | 0.005   | 0.767                |
| NPTX2    | AAVLQLR             | 0.255                | 0.202            | 0.031   | 0.711                |
| PPBP     | ICLDPDAPR           | 0.029                | 0.078            | 0.054   | 0.690                |
| RTN4RL2  | SLEPDTFQGLER        | 0.199                | 0.167            | 0.077   | 0.747                |
| RTN4RL2  | LFLQNNLIR           | 0.807                | 0.688            | 0.108   | 0.717                |
| SERPINA1 | SVLGQLGITK          | 81.54                | 110.2            | 0.002   | 0.785                |
| SERPINA1 | LSSWVLLMK           | 71.00                | 89.51            | 0.021   | 0.757                |
| SERPINA1 | LYHSEAVTVNFGDTEAK   | 80.87                | 94.96            | 0.036   | 0.735                |
| SERPINA3 | AVLDVFEEGTEASAATAVK | 56.08                | 75.85            | 0.0004  | 0.816                |

|          |                |       |       |        |       |
|----------|----------------|-------|-------|--------|-------|
| SERPINA3 | LINDYVK        | 1.329 | 1.692 | 0.011  | 0.774 |
| ST8SIA5  | EINSADFVFR     | 0.021 | 0.019 | 0.247  | 0.574 |
| TPI1     | QSLGELIGTLNAAK | 0.467 | 0.425 | 0.221  | 0.437 |
| UCLH1    | FSAVALCK       | 0.008 | 0.01  | 0.0007 | 0.774 |

---
